# Supplementary material
Source: ML conference proceedings conference paper supplement (https://openreview.net/forum?id=VaXnxQ3UKo)
Supplement: supplementary_material [file attachment]

**<question>**  
Suppose that  $a^2$  varies inversely with  $b^3$ . If  $a=7$  when  $b=3$ , find the value of  $a^2$  when  $b=6$ .  
**</question>**

(a)

**<step>**  
**<p>**  
To solve this problem, we need to establish an equation based on the given information. Let  $k$  be the constant of variation. Since  $a^2$  varies inversely with  $b^3$ , we have  $a^2 = \frac{k}{b^3}$ . Using the given values  $a=7$  and  $b=3$ , we can solve for  $k$ .  
**</p>**  
**<code>**  
```python  
# a^2 varies inversely with b^3  
# if a=7 when b=3, find the value of a^2 when b=6  
# establish equation  
k = 7\*\*2 \* 3\*\*3  
print(k)  
```  
**</code>**  
**<output>**  
1323  
**</output>**  
**</step>**

$P = 0.99$   
 $Q = 0.91$   
value = 0.67

(b)

**<step>**  
**<p>**  
Let  $k$  be the constant of variation. Since  $a^2$  varies inversely with  $b^3$ , we have the equation  $a^2 = \frac{k}{b^3}$ . We are given that  $a=7$  when  $b=3$ , so  $7^2 = \frac{k}{3^3}$  which implies  $k = 7^2 \times 3^3$ . Therefore, the equation for  $a^2$  in terms of  $b$  is  $a^2 = \frac{7^2 \times 3^3}{b^3}$ .  
**</p>**  
**<code>**  
```python  
import sympy as sp  
# Define the variables  
a, b = sp.symbols('a b')  
# Define the equation for the constant of variation  
k = 7\*\*2 \* 3\*\*3  
# Define the equation for a^2 in terms of b  
a\_squared = k / b\*\*3  
# Find the value of a^2 when b=6  
a\_squared\_when\_b\_is\_6 = a\_squared.subs(b, 6)  
print(a\_squared\_when\_b\_is\_6)  
```  
**</code>**  
**<output>**  
49/8  
**</output>**  
**</step>**

$P = 0.95$   
 $Q = 0.77$   
value = 0.51

(c)

**<step>**  
**<p>**  
The constant of variation is  $k = 1323$ . Now we can use this value to find the value of  $a^2$  when  $b=6$ .  
**</p>**  
**<code>**  
```python  
# find the value of a^2 when b=6  
a\_squared = 1323 / 6\*\*3  
print(a\_squared)  
```  
**</code>**  
**<output>**  
6.125  
**</output>**  
**</step>**

$P = 0.99$   
 $Q = 0.94$   
value = 0.79

(d)

**<step>**  
**<p>**  
From the result, we have  $k = 1323$ . Now we can use this value to find the value of  $a^2$  when  $b=6$ .  
**</p>**  
**<code>**  
```python  
# find the value of a^2 when b=6  
a\_squared = 1323 / 6\*\*3  
print(a\_squared)  
```  
**</code>**  
**<output>**  
6.125  
**</output>**  
**</step>**

$P = 0.99$   
 $Q = 0.94$   
value = 0.76

(e)

**<step>**  
**<p>**  
From the result, we can see that when  $b=6$ ,  $a^2$  has a value of  $\frac{49}{8}$ .  
**</p>**  
**<p>**  
Final Answer:  $\frac{49}{8}$   
**</p>**  
**</step>**

$P = 0.94$   
 $Q = 1.0$

(f)

**<step>**  
**<p>**  
The value of  $a^2$  when  $b=6$  is \$6.125\$.  
**</p>**  
**<p>**  
Final Answer: \$6.125\$  
**</p>**  
**</step>**

$P = 0.99$   
 $Q = 1.0$

(g)

**<step>**  
**<p>**  
From the result, we can see that when  $b=6$ , the value of  $a^2$  is \$6.125\$.  
**</p>**  
**<p>**  
Final Answer: \$6.125\$  
**</p>**  
**</step>**

$P = 0.97$   
 $Q = 1.0$

(h)

**<step>**  
**<p>**  
The value of  $a^2$  when  $b=6$  is 6.125.  
**</p>**  
**<p>**  
Final Answer: \$6.125\$  
**</p>**  
**</step>**

$P = 0.99$   
 $Q = 1.0$
